# Supplementary material for: Anti-Proliferation, Pro-Apoptosis and Anti-Migration Effects of Ginkgolic Acid C13:0 Isolated from Ginkgo Biloba Exocarp in MCF-7 and 4T-1 Breast Cancer Cells
Source: Preprints.org preprint supplement (doi:10.20944/preprints201801.0271.v1), 2018-01-29
Supplement: Supplementary file 1 [file supplementary]

# Supplementary Materials: Anti-proliferation, pro-apoptosis and anti-migration effects of ginkgolic acid C13:0 isolated from ginkgo biloba exocarp in MCF-7 and 4T-1 breast cancer cells

Da-Yu Zhou <sup>1</sup>, Chun-Ying Jiang <sup>2</sup>, Cheng-Hao Fu <sup>2</sup>, Ping Chang <sup>2</sup>, Xiao-Hui Zhao <sup>3</sup>, Jia-Di Wu<sup>1</sup>, Ke-Xin Zheng <sup>1</sup>, Shi-Liang Ma <sup>1,2,\*</sup>

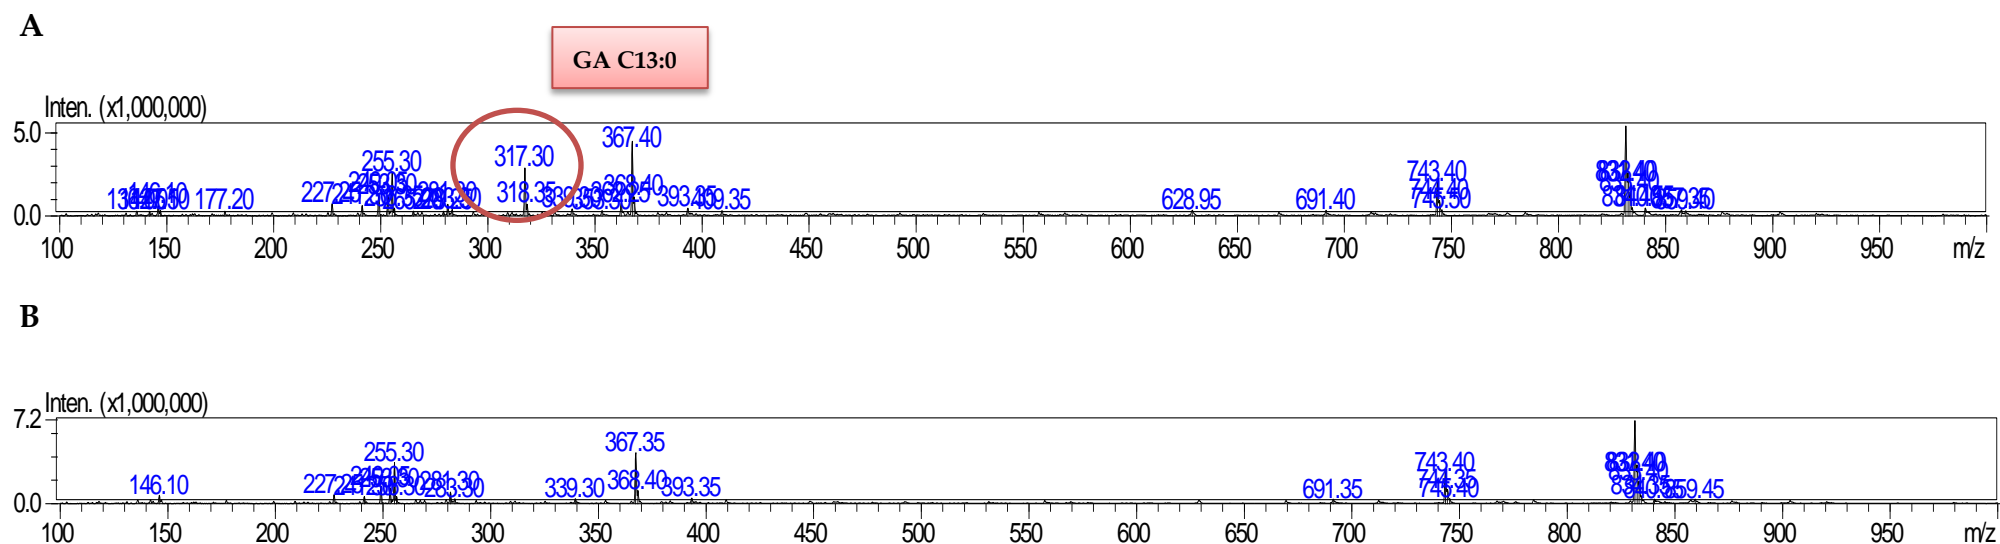

**Figure S1.** Mass spectrum of ginkgolic acid C13:0 analysed by ESI-MS. (A) spectrum of ginkgolic acid C13:0, m/z 319.5 [M-H]<sup>-</sup>. (B) spectrum of the blank control

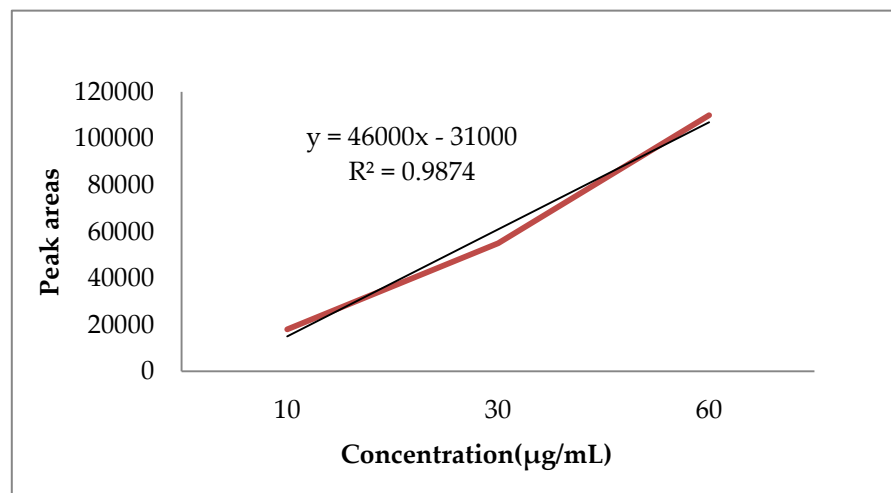

**Figure S2.** The standard concentration curve of ginkgolic acid C13:0. The ginkgolic acid C13:0 had a purity of >85% on the basis of HPLC and the comparison with the standard of ginkgolic acids.
